# Supplementary material for: Phosphatidylinositol Kinases and Phosphatases in Entamoeba histolytica
Source: Front Cell Infect Microbiol. 2019 Jun 6;9:150. doi: 10.3389/fcimb.2019.00150 (PMC6563779; doi:10.3389/fcimb.2019.00150)
Supplement: Supplementary Table S1 (Tab 1 in Table 1) — Potential PI kinase orthologs in E. histolytica. H. sapiens enzymes used as queries, and E-values are shown. [file Table_1.xlsx]

## Sheet: S1_kinases
	Table S1 PI kinases in E. histolytica
			Query				Homologue in E. histolytica
	Enzyme		protein name (H. sapiens)	Gene name（H. sapiens）	Accession No.	NLS	Amoeba gene ID No.	E-value	NLS
	PI 3-kinase	Class I	p110α	PIK3CA	NP_006209		EHI_006130	4e-131
			p110β	PIK3CB	NP_006210		EHI_095130	2e-115
			p110γ	PIK3CG	AAH35683		EHI_040690	3e-105
			p110δ	PIK3CD	NP_005017		EHI_013980	7e-103
							EHI_188970	2e-103
							EHI_009890	2e-57
		Class II	PIK3C2α	PIK3C2A	NP_002636
			PIK3C2β	PIK3C2B	NP_002637
			PIK3C2γ	PIK3C2G	NP_001275701
		Class III	Vps34	PIK3C3	AAH53651		EHI_096560	1e-87
	PI 4-kinase	Type II	PI4KIIα	PI4K2A	NP_060895
			PI4KIIβ	PI4K2B	NP_060793
		Type III	PI4KIIIα	PI4KA	NP_477352	997-989, 1754-1763	EHI_148700	3e-144
			PI4KIIIβ	PI4KB	AAH40300
	PIP kinase	Type I	PIPKIα	PIP5K1A	NP_001129110	263-272, 457-469	EHI_153770	1e-38	511-524
			PIPKIβ	PIP5K1B	AAH30587	445-454
			PIPKIγ	PIP5K1C	NP_001287778	257-260
		Type II	PIPKIIα	PIP5K2A	NP_005019
			PIPKIIβ	PIP5K2B	NP_003550
			PIPKIIγ	PIP5K2C	NP_001139730	26-34
		TypeIII	PIKFYVE	PIP5K3	NP_055855	469-503	EHI_049480	4e-45

## Sheet: S2_phosphatases
Table S2 PI phosphatases in E. histolytica
		Query				Homologue in E. histolytica
Enzyme		Protein name (H. sapiens)	Gene name (H. sapiens)	Accession No.	NLS	Amoeba gene ID No.	E-value	NLS
PI 3-phosphatase		PTEN	PTEN	AAD13528	10-19	EHI_197010	3e-64
						EHI_098450	3e-57
						EHI_131070	3e-52
						EHI_041900	7e-44	152-167, 153-164
						EHI_010360	1e-39
						EHI_054460	7e-31
		TPIPα	TPIPα	CAD13144.1
		TPIPβ	TPIPβ	CAD13145.1
		TPIPγ	TPIPγ	AAP 45146.1
		MTM1	MTM1	NP_000243		EHI_070120	1e-92	18-49
		MTMR3	MTMR3	AAI52456.1		EHI_161190	8e-89
		MTMR6	MTMR6	EAX08367.1		EHI_049780	2e-82
		MTMR9	MTMR9	NP_056273.2		EHI_016430	3e-78
						EHI_031310	7e-75
						EHI_104710	7e-64
						EHI_024380	2e-64
						EHI_188050	3e-59
						EHI_087780	2e-58
						EHI_140980	7e-64
		MTMR14	MTMR14	AAH01674.2
		MTMR5	MTMR5	NP_002963.2
		inactive myotubularin/LRR/ROCO/kinase (IMLRK)				EHI_137960	1e-15
						EHI_135010	3e-10
						EHI_151670	2e-05
						EHI_048230	0.0001
						EHI_078170	0.0004
						EHI_185230	0.001
						EHI_197200	0.001
						EHI_141820	0.002
						EHI_107230	0.066
PI 4-phosphatase		INPP4A	INPP4A	AAH28361
		INPP4B	INPP4B	NP_001095139	813-825, 814-823
		TMEM55A	TMEM55A	NP_061180
		TMEM55B	TMEM55B	NP_001094284
PI 5-phosphatase	Type II	Synaptojanin	SYNJ	AAC51922	527-540
		Synaptojanin2	SYNJ2	NP_003889.1
		OCRL1	OCRL1	AAB03839		EHI_153490	1e-71
						EHI_159880	1e-61
						EHI_088450	8e-33
						EHI_046590	7e-31	190-203, 190-199
						EHI_160860	3e-28
						EHI_079220	4e-19
		INPP5B	INPP5B	P32019.4
		INPP5J	INPP5J	NP_001271214	667-678
		SKIP	SKIP	NP_057616.2
	Type III	SHIP	SHIP	NP_001017915
	Type IV	INPP5E	INPP5E	NP_063945.2
Sac family phosphatase		SACM1	Sac1	NP_054735		EHI_141860	2e-82
						EHI_040380	6e-62
						EHI_048570	1e-60
		INPP5F	Sac2	NP_055752
		Fig4	Sac3	NP_055660	107-117

## Sheet: S3_ClassI PI3Ks
Table S3. Similarity between H. sapiens and E. histolytica class I PI 3-kinases
	EHI_006130	EHI_095130	EHI_040690	EHI_188970	EHI_013980	EHI_009890
p110α	4e-131	2e-115	3e-105	2e-103	7e-103	2e-57
p110β	1e-136	1e-122	1e-107	2e-107	4e-112	4e-66
p110δ	2e-122	5e-119	1e-95	1e-107	2e-105	3e-54
p110γ	3e-122	1e-116	1e-103	2e-97	6e-106	8e-61

## Sheet: S4_MTMs
Table S4. Similariy between H. sapiens and E. histolytica MTM and MTMRs
	EHI_070120	EHI_161190	EHI_049780	EHI_016430	EHI_031310	EHI_104710	EHI_024380	EHI_188050	EHI_087780	EHI_140980
MTM1	1e-92	8e-89	2e-82	3e-78	7e-75	7e-64	2e-64	3e-59	2e-58	4e-40
MTMR3	6e-62	1e-51	1e-55	4e-62	1e-48	4e-48	1e-44	3e-32	8e-44	2e-21
MTMR6	1e-81	3e-82	4e-72	3e-71	6e-61	1e-59	4e-57	1e-47	4e-59	3e-29
MTMR9	6e-59	4e-57	9e-47	9e-60	5e-49	5e-49	3e-40	7e-37	4e-40	3e-34

## Sheet: S5_PI 5-phosphatases
Table S5 Similariy between H. sapiens and E. histolytica PI 5-phosphatases
	EHI_153490	EHI_159880	EHI_088450	EHI_046590	EHI_160860	EHI_079220	EHI_048570	EHI_040380	EHI_141860
Synaptojannin	3e-36	3e-26	1e-42	3e-42	3e-41	7e-27	1e-46	6e-44	5e-40
OCRL1	1e-71	1e-61	7e-62	3e-60	1e-64	1e-36	-	-	-
INPP5B	2e-64	5e-59	1e-58	4e-51	1e-51	9e-36	-	-	-
INPP5J	9e-31	3e-21	8e-33	7e-31	3e-28	4e-19	-	-	-
SKIP	2e-23	2e-29	2e-25	9e-28	9e-26	3e-16	-	-	-
SHIP	1e-18	3e-24	3e-24	5e-25	9e-24	8e-13	-	-	-
INPP5E	2e-18	2e-18	2e-17	3e-15	7e-14	9e-18	-	-	-

## Sheet: S6_abbreviation list
	Table S6 abbreviation list
	abbreviation	definition	description (PI kinases and phosphatases)
	ABD	adaptor binding domain
	ABP	actin binding proteins
	Akt	protein kinase B
	AP complex	adaptor protein complex
	Arf1	ADP-ribosylation factor 1
	ASH	ASPM, SPD2, hydin
	BAR	Bin, amphiphysin, Rvs
	C2	Ca2+ binding domain
	CCP	clathrin-coated pit
	CCV	clathrin-coated vesicle
	CDP	cytidine diphosphate
	CEAP	ceramide aminoethylphosphonate
	CP	cysteine protease
	CPY	carboxypeptidase Y
	DAG	diacylglycerol
	DENN	differentially expressed in normal and neoplastic cells
	DEP	dishevelled, Egl-10, and pleckstrin
	DOK	downstream of kinase
	EGF	epidermal growth factor
	ER	endopasmic reticulum
	ESCRT	endosomal sorting complex required for transport
	Fig4	factor-induced gene	Sac family phosphatase in yeast, Sac3 homolog
	FYVE	Fab-1,YGL023, Vps27, EEA1
	GAP	GTPase activating protein
	GEF	GTP/GDP exchange factor
	GGA	Golgi-localized, gamma adaptin ear-containing, ARF-binding
	GPCR	G-protein-coupled receptor
	Grb2	growth factor receptor-bound protein 2
	IMLRK	inactive myotubularin/LRR/ROCO/kinase
	INPP4	inositol polyphosphate-4-phosphatase	PI 4-phosphagase
	INPP5	inositol polyphosphate-5-phosphatase	inositol polyphosphate-5-phosphatase
	Ins(1,4,5)P3	inositol 1,4,5-trisphosphate
	ITAM	immunoreceptor tyrosine-based activation
	ITIM	immunoreceptor tyrosine-based inhibitory
	LKU	lipid kinase unique
	MEF	mouse embryonic fibroblast
	Mss4p	Multicopy Suppressor of Stt4 mutation
	MTM	myotubularin	PI 3-phosphatase
	MTMR	myotuburalin-related	PI 3-phosphatase
	mTORC1	mammalian target of rapamycin complex-1
	MVB	multivesicular bodiy
	NLS	nuclear localization signal
	NPF	asparagine-proline-phenylalanine
	OCRL1	Oculo-Cerebro-Renal Syndrome of Lowe 1	type II PI 5-phosphatase
	PA	phosphatidic acid
	PDZ	PSD-95, DLG, and ZO-1
	PEST	proline, glutamine, serine, threonine
	PH	pleckstrin homology
	PH-GRAM	pleckstrin homology-glucosyltransferase, Rab-like GTPase activator and myotubularin
	PI	phosphoinositide
	PI 5-kinase	type III PIP kinase	type III PIP kinase
	PIP	phosphatidylinositol phosphate
	PIP kinase	phosphatidylinositol phosphate kinase	phosphatidylinositol phsphate kinase
	PIP4-kinase	type II PIP kinase	type II PIP kinase
	PIP5-kinase	type I PIP kinase	type I PIP kinase
	PIS	phosphatidylinositol synthase
	PITP	phosphoinositide transfer protein
	PKC	protein kinase C
	PLC	phospholipase C
	PLD	phospholipase D
	PtdIns	phosphatidylinositol
	PtdIns(3,4,5)P3	phosphatidylinositol 3,4,5-trisphosphate
	PtdIns(4,5)P2	phosphatidylinositol 4,5-bisphosphate
	PtdIns3P	phosphatidylinositol 3-phosphate
	PtdIns4P	phosphatidylinositol 4-phosphate
	PtdIns5P	phosphatidylinositol 5-phosphate
	PTEN	phosphatase and tensin homology located on chromosome 10	PI 3-phosphatase
	PX	Phox homology
	Rab	Ras-related in brain
	RBD	Ras binding domain
	Rho	Ras homologous
	ROCK	Rho-associated protein kinase
	Sac	suppressor of actin	Sac family phosphatase
	Sec	secretion -defective
	SH2	Src homology 2
	Shc	Src homology and collagen
	SHIP	SH2-containing inositol phosphatase	type III PI 5-phosphatase
	SKIP	skeletal muscle and kidney enriched inositol phosphatase	type II PI 5-phosphatase
	sn	stereospecifically numbered
	SNX	sorting nexin
	SYNJ	synaptojanin	type II PI 5-phosphatase
	TCP-1	t-complex polypeptide-1
	TMEM55	transmembrane protein 55	PI 4-phosphagase
	TPIP	TPTE and PTEN homologs inositol lipid phosphatase	PI 3-phosphatase
	TPTE	transmembrane phosphatase with tensin homology	PI 3-phosphatase
	ULK1	unc-51-like kinase 1
	Vps34	vacuolar protein sorting 34; class III PI 3-kinase	class III PI 3-kinase
	WASH	Wiskott-Aldrich Syndrome and SCAR homolog
	WIPI	WD repeat domain phosphoinositide-interacting protein
	Ypt	yeast protein two
